# Supplementary material
Source: PubMed Central journal article supplement (PMC8513534)

Figure 1A

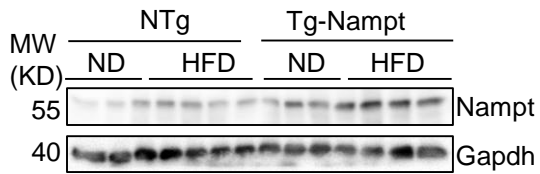

Full unedited gel for Figure 1A

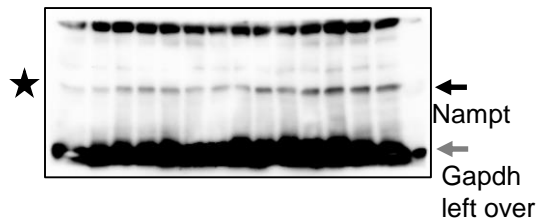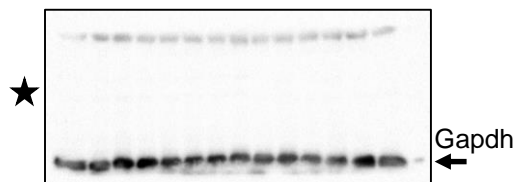

★ Identical Gel to NADK and Gapdh blots of Figure 3C

Figure 2E

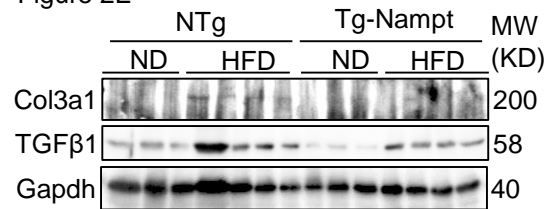

Full unedited gel for Figure 2E

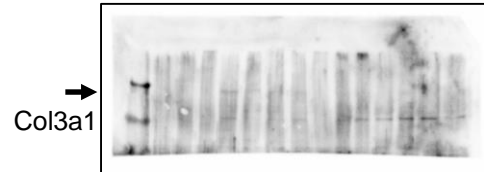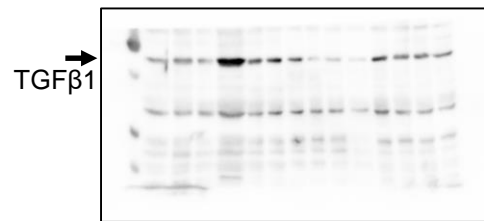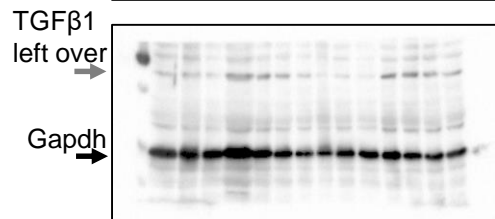

Figure 2F

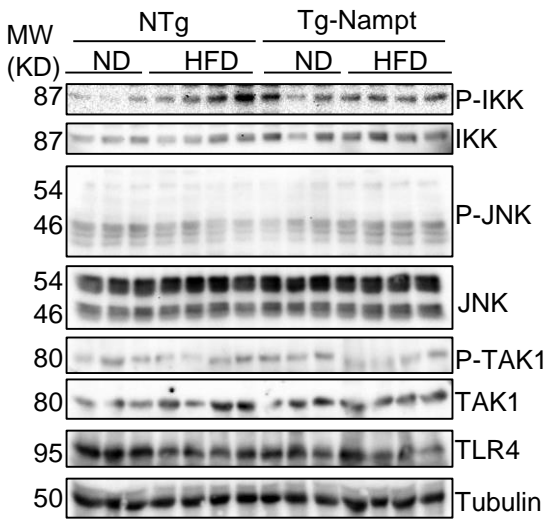

Full unedited gel for Figure 2F

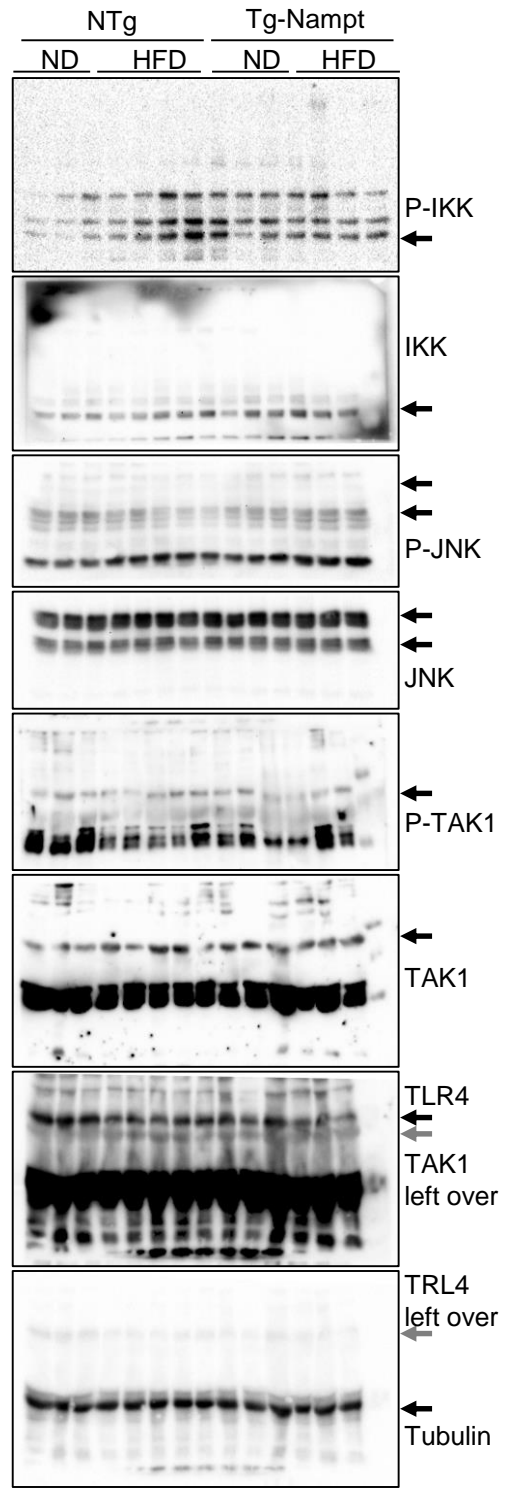

Figure 3C

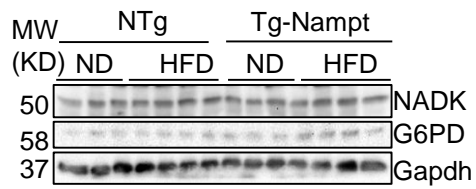

Full unedited gel for Figure 3C

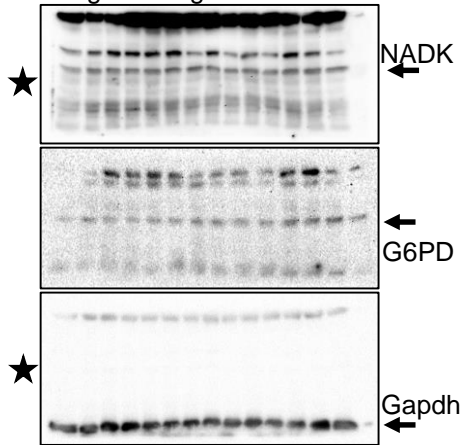

★ Identical Gel to Figure 1A

Figure 4B

Full unedited gel for Figure 4B

Figure 4

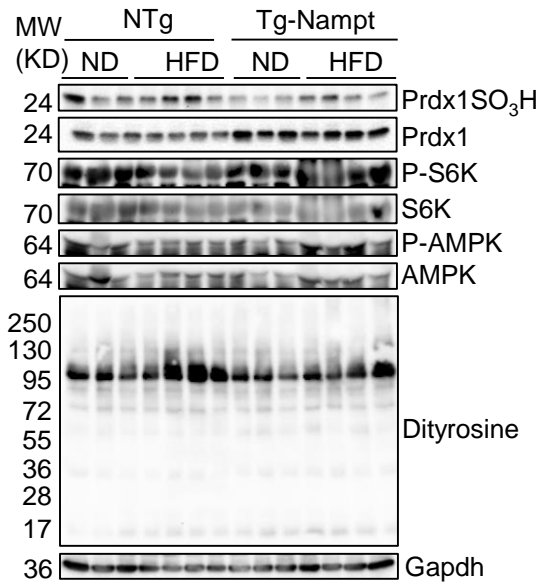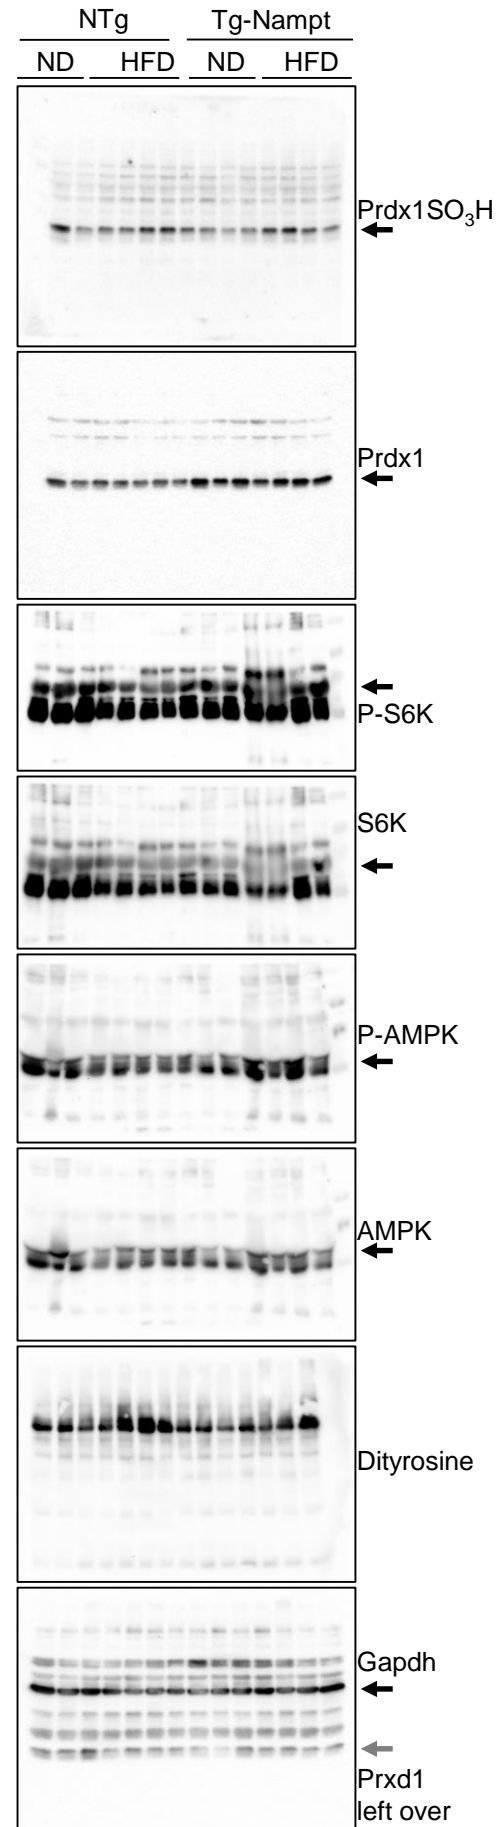

Figure 6A

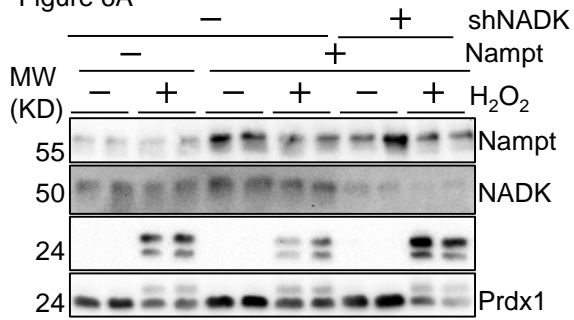

Full unedited gel for Figure 6A

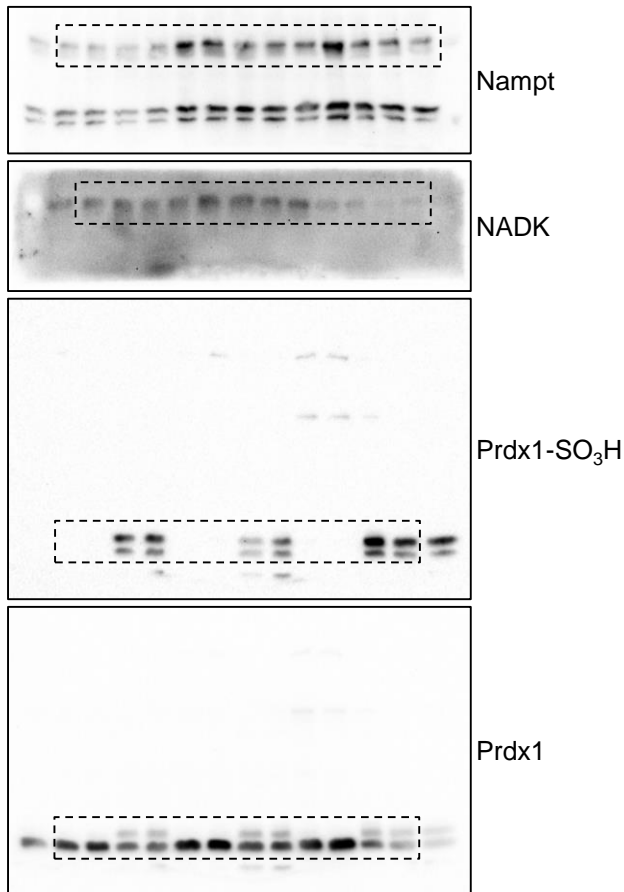

Figure 6B

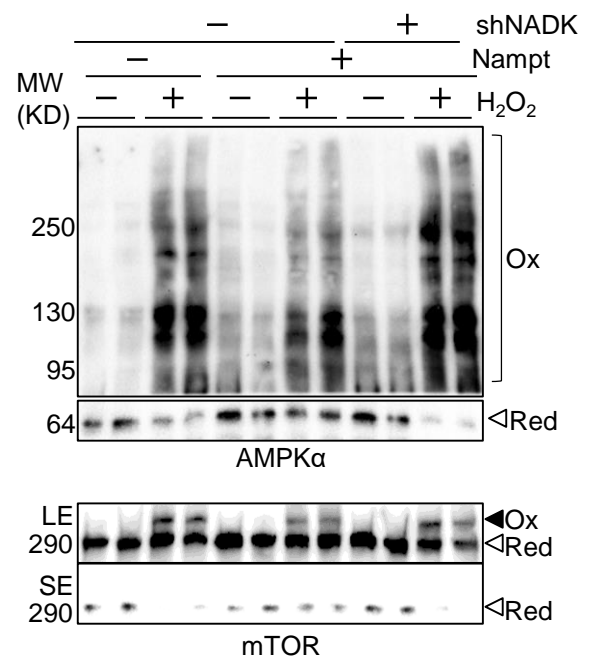

Full unedited gel for Figure 6B

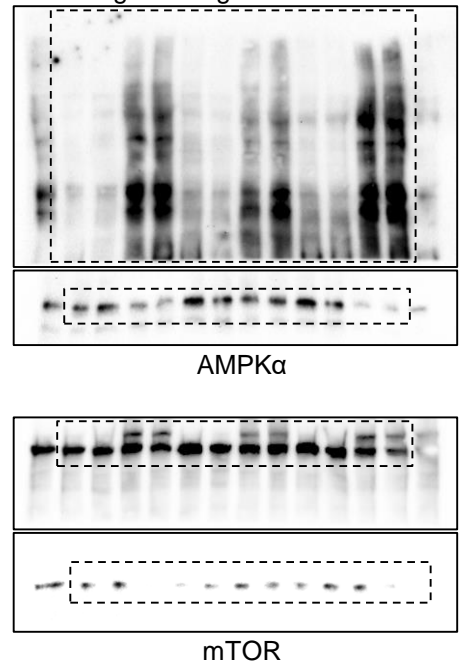

Figure 6C

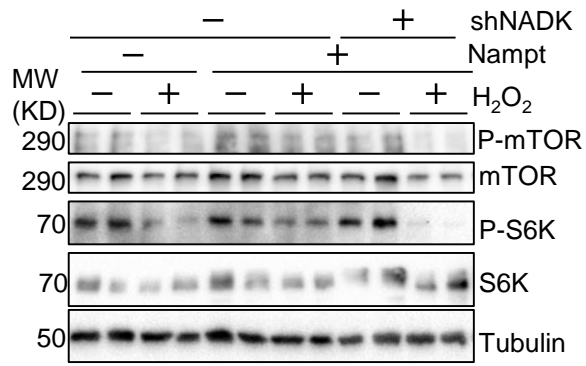

Full unedited gel for Figure 6C

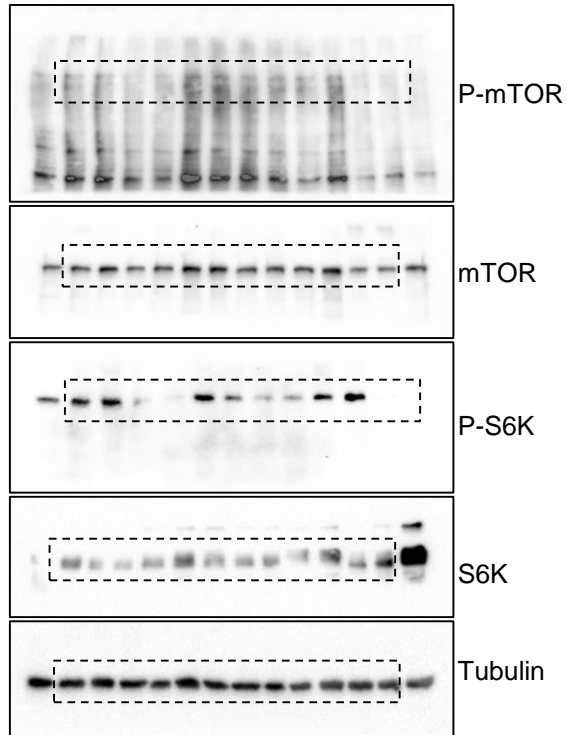

Figure 6F

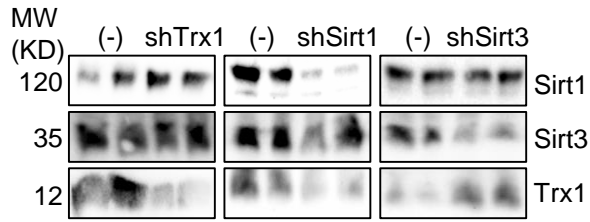

Full unedited gel for Figure 6F

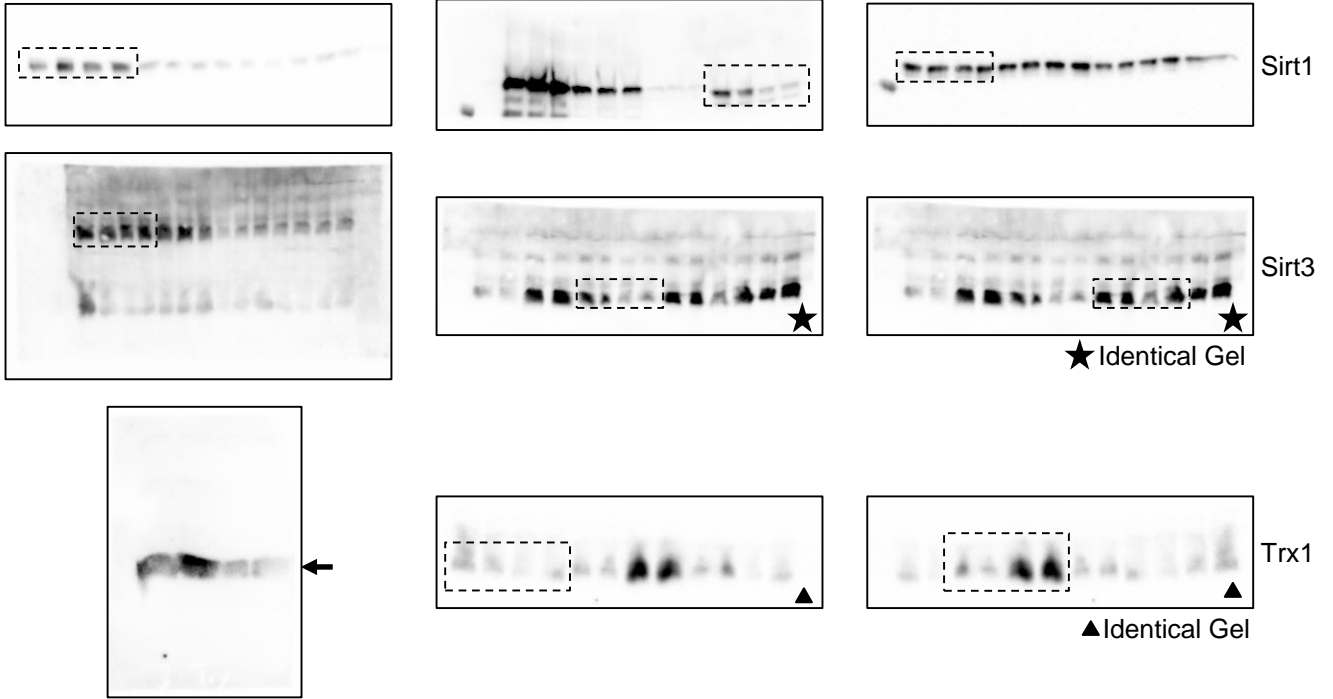

Figure 7C

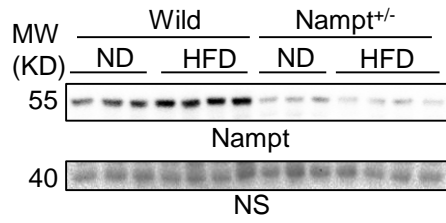

Full unedited gel for Figure 7C

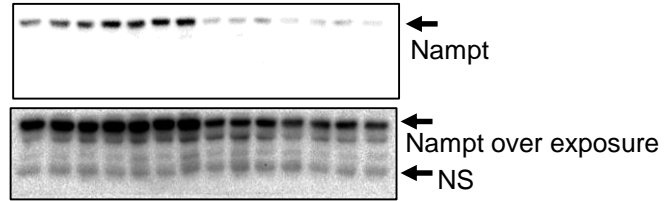

Figure 7G

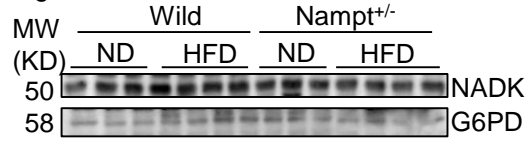

Full unedited gel for Figure 7G

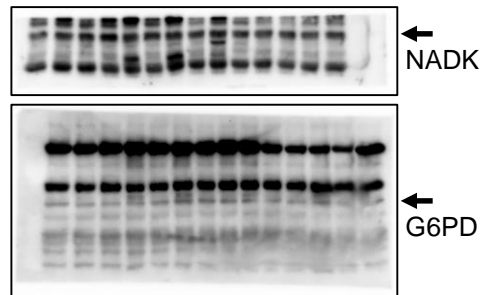



Figure 7G

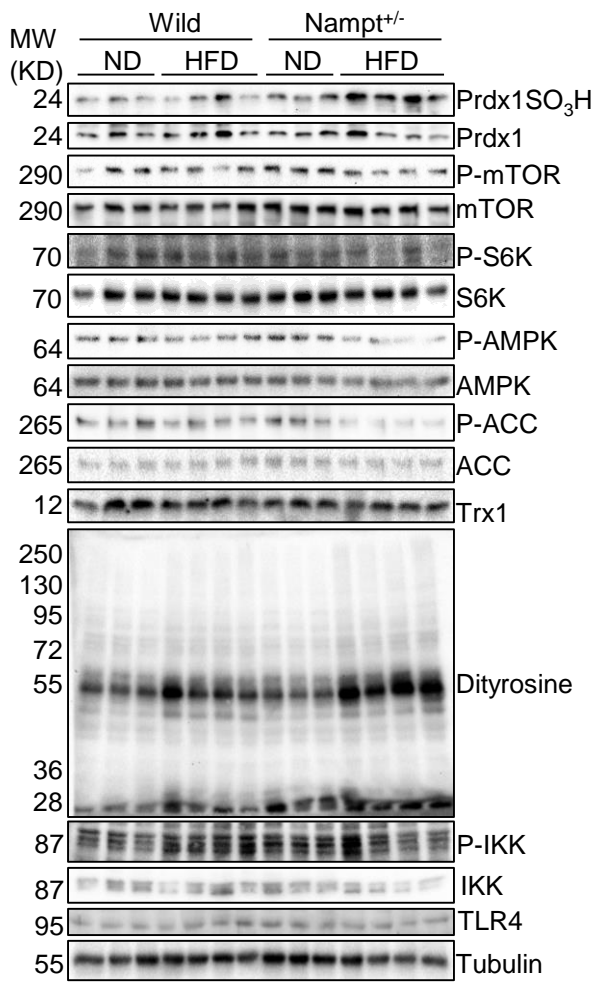

Full unedited gel for Figure 7G

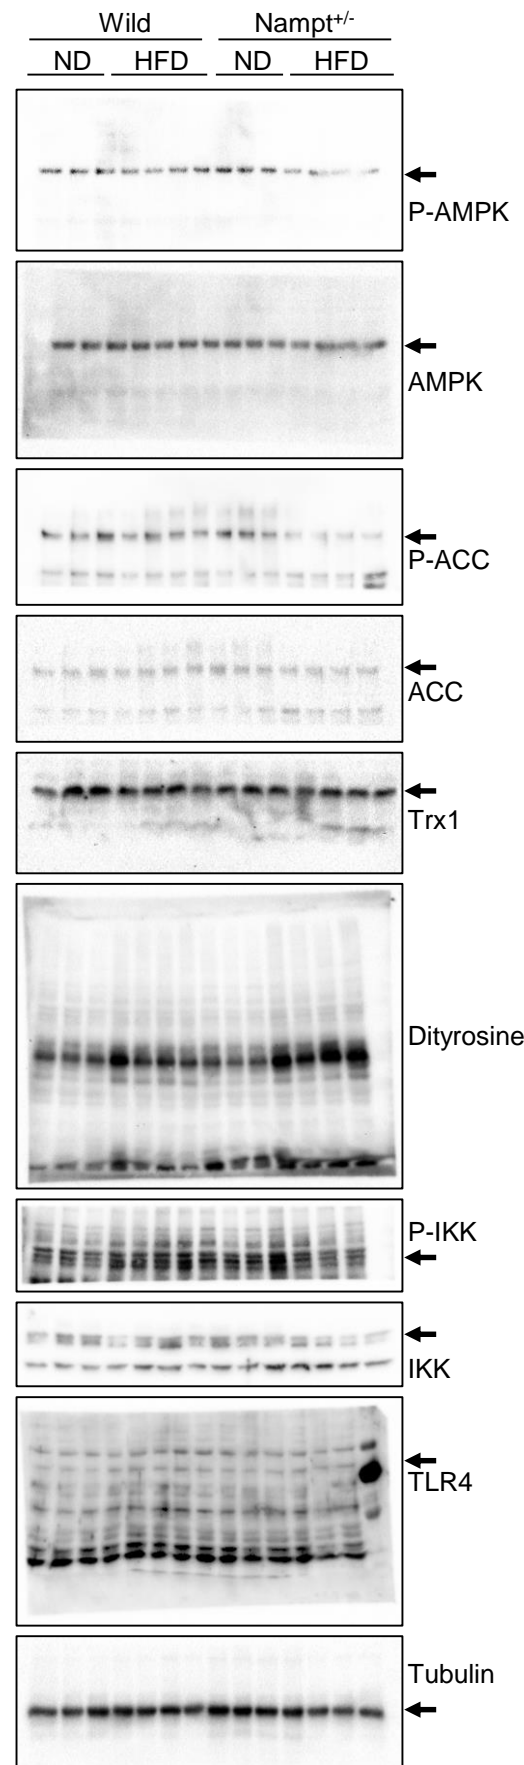

Full unedited gel for Figure 7J

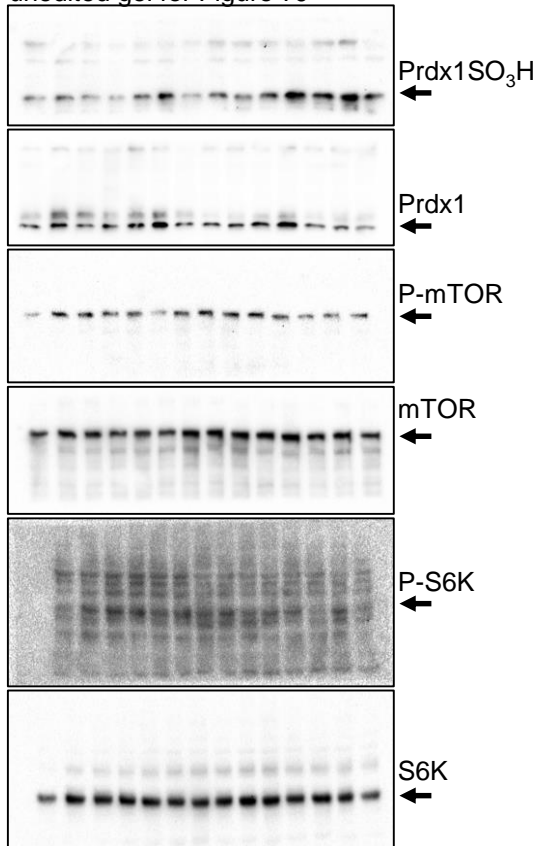

Figure 8A

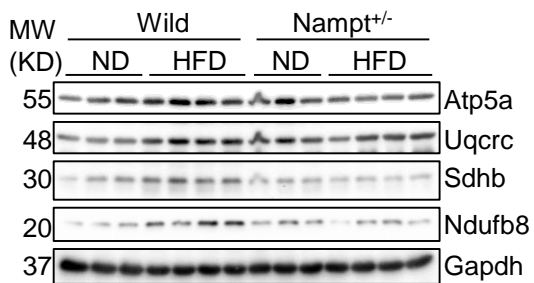

Full unedited gel for Figure 8A

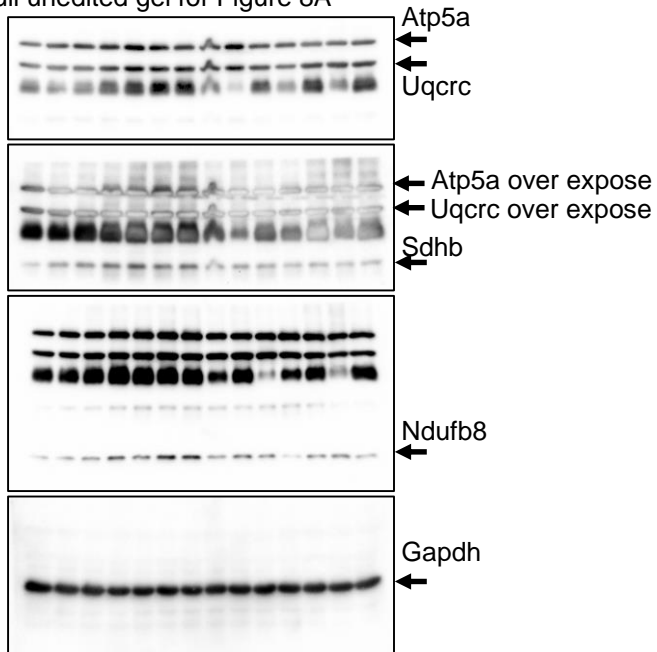

Figure 8E

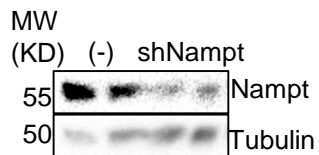

Full unedited gel for Figure 8E

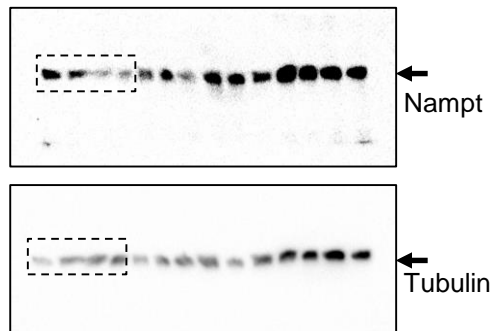

Supplement: NIHMS1699417-supplement-317943_Uncut_Gels.pdf [file NIHMS1699417-supplement-317943_Uncut_Gels.pdf]
