# Supplementary material
Source: PubMed Central journal article supplement (PMC8513534)
Supplement: NIHMS1699417-supplement-317943_Major_Resources_Table.pdf [file NIHMS1699417-supplement-317943_Major_Resources_Table.pdf]

## Major Resources Table

### Genetically Modified Animals

|                        | Species         | Vendor or Source               | Background Strain | Other Information               | Persistent ID / URL                |
|------------------------|-----------------|--------------------------------|-------------------|---------------------------------|------------------------------------|
| <b>Parent - Male</b>   | Mouse, Tg-Nampt | Lab resource                   | FVB               |                                 | doi: 10.1161/CIRCRESAHA.109.203703 |
| <b>Parent - Female</b> | Mouse, Tg-Nampt | Lab resource                   | FVB               |                                 | doi: 10.1161/CIRCRESAHA.109.203703 |
| <b>Parent - Male</b>   | Mouse, Nampt+/- | Kyoto University, Kyoto, Japan | C57BL/6           | Provided by Dr. Shinya Yamanaka | doi: 10.1152/ajpheart.00222        |
| <b>Parent - Female</b> | Mouse, Nampt+/- | Kyoto University, Kyoto, Japan | C57BL/6           | Provided by Dr. Shinya Yamanaka | doi: 10.1152/ajpheart.00222        |

### Antibodies

| Target antigen                           | Vendor or Source                | Catalog # | Working concentration | Persistent ID / URL                                                                                                                                                                                                       |
|------------------------------------------|---------------------------------|-----------|-----------------------|---------------------------------------------------------------------------------------------------------------------------------------------------------------------------------------------------------------------------|
| Nampt (Visfatin)                         | Bethyl                          | A700-058  | 1:1000-1:5000         | <a href="https://www.bethyl.com/product/A700-058">https://www.bethyl.com/product/A700-058</a>                                                                                                                             |
| Nampt (Visfatin)                         | Abcam                           | Ab58640   | 1:1000-1:5000         | It has been discontinued.                                                                                                                                                                                                 |
| NADK                                     | Cell Signaling Technology (CST) | 55948     | 1:1000-1:5000         | <a href="https://www.cellsignal.com/products/primary-antibodies/nadk-antibody/55948">https://www.cellsignal.com/products/primary-antibodies/nadk-antibody/55948</a>                                                       |
| Phospho-<br>IKK                          | CST                             | 2697      | 1:1000-1:5000         | <a href="https://www.cellsignal.com/products/primary-antibodies/phospho-ikka-b-ser176-180-16a6-rabbit-mab/2697">https://www.cellsignal.com/products/primary-antibodies/phospho-ikka-b-ser176-180-16a6-rabbit-mab/2697</a> |
| IKK $\alpha$                             | CST                             | 2682      | 1:1000-1:5000         | <a href="https://www.cellsignal.com/products/primary-antibodies/ikka-antibody/2682">https://www.cellsignal.com/products/primary-antibodies/ikka-antibody/2682</a>                                                         |
| IKK $\beta$                              | CST                             | 2678      | 1:1000-1:5000         | <a href="https://www.cellsignal.com/products/primary-antibodies/ikkb-l570-antibody/2678">https://www.cellsignal.com/products/primary-antibodies/ikkb-l570-antibody/2678</a>                                               |
| Phospho-<br>mTOR<br>(Ser2481)            | CST                             | 2974      | 1:1000-1:5000         | <a href="https://www.cellsignal.com/products/primary-antibodies/phospho-mtor-ser2481-antibody/2974">https://www.cellsignal.com/products/primary-antibodies/phospho-mtor-ser2481-antibody/2974</a>                         |
| mTOR                                     | CST                             | 2972      | 1:1000-1:5000         | <a href="https://www.cellsignal.com/products/primary-antibodies/mtor-antibody/2972">https://www.cellsignal.com/products/primary-antibodies/mtor-antibody/2972</a>                                                         |
| Phospho-<br>p70 S6<br>Kinase<br>(Thr389) | CST                             | 9205      | 1:1000-1:5000         | <a href="https://www.cellsignal.com/products/primary-antibodies/phospho-p70-s6-kinase-thr389-antibody/9205">https://www.cellsignal.com/products/primary-antibodies/phospho-p70-s6-kinase-thr389-antibody/9205</a>         |
| p70 S6<br>Kinase                         | CST                             | 9202      | 1:1000-1:5000         | <a href="https://www.cellsignal.com/products/primary-antibodies/p70-s6-kinase-antibody/9202">https://www.cellsignal.com/products/primary-antibodies/p70-s6-kinase-antibody/9202</a>                                       |
| Phospho-<br>AMPK $\alpha$<br>(Thr172)    | CST                             | 2535      | 1:1000-1:5000         | <a href="https://www.cellsignal.com/products/primary-antibodies/phospho-ampka-thr172-40h9-rabbit-mab/2535">https://www.cellsignal.com/products/primary-antibodies/phospho-ampka-thr172-40h9-rabbit-mab/2535</a>           |
| AMPK $\alpha$ 2                          | CST                             | 2757      | 1:1000-1:5000         | <a href="https://www.cellsignal.com/products/primary-antibodies/ampka2-antibody/2757">https://www.cellsignal.com/products/primary-antibodies/ampka2-antibody/2757</a>                                                     |
| Phospho-                                 | CST                             | 9251      | 1:1000-               | <a href="https://www.cellsignal.com/products/primary-antibodies/phospho-">https://www.cellsignal.com/products/primary-antibodies/phospho-</a>                                                                             |

DOI [to be added]

|                                                        |                         |             |                |                                                                                                                                                                                                                                                                                                                     |
|--------------------------------------------------------|-------------------------|-------------|----------------|---------------------------------------------------------------------------------------------------------------------------------------------------------------------------------------------------------------------------------------------------------------------------------------------------------------------|
| SAPK/JNK (Thr183/Tyr185)                               |                         |             | 1:5000         | sapk-jnk-thr183-tyr185-antibody/9251                                                                                                                                                                                                                                                                                |
| SAPK/JNK                                               | CST                     | 9252        | 1:1000-1:5000  | <a href="https://www.cellsignal.com/products/primary-antibodies/sapk-jnk-antibody/9252">https://www.cellsignal.com/products/primary-antibodies/sapk-jnk-antibody/9252</a>                                                                                                                                           |
| Phospho-TAK1 (Thr184/187)                              | CST                     | 4531        | 1:1000-1:5000  | <a href="https://www.cellsignal.com/products/primary-antibodies/phospho-tak1-thr184-187-antibody/4531">https://www.cellsignal.com/products/primary-antibodies/phospho-tak1-thr184-187-antibody/4531</a>                                                                                                             |
| TAK1                                                   | CST                     | 5206        | 1:1000-1:5000  | <a href="https://www.cellsignal.com/products/primary-antibodies/tak1-d94d7-rabbit-mab/5206">https://www.cellsignal.com/products/primary-antibodies/tak1-d94d7-rabbit-mab/5206</a>                                                                                                                                   |
| Glucose-6-Phosphate Dehydrogenase                      | CST                     | 8866        | 1:1000-1:5000  | <a href="https://www.cellsignal.com/products/primary-antibodies/glucose-6-phosphate-dehydrogenase-antibody/8866">https://www.cellsignal.com/products/primary-antibodies/glucose-6-phosphate-dehydrogenase-antibody/8866</a>                                                                                         |
| GAPDH                                                  | CST                     | 2118S       | 1:5000         | <a href="https://www.cellsignal.com/products/primary-antibodies/gapdh-14c10-rabbit-mab/2118">https://www.cellsignal.com/products/primary-antibodies/gapdh-14c10-rabbit-mab/2118</a>                                                                                                                                 |
| Thioredoxin 1                                          | CST                     | 2429        | 1:1000-1:5000  | <a href="https://www.cellsignal.com/products/primary-antibodies/thioredoxin-1-c63c6-rabbit-mab/2429">https://www.cellsignal.com/products/primary-antibodies/thioredoxin-1-c63c6-rabbit-mab/2429</a>                                                                                                                 |
| TGFβ1                                                  | Abcam                   | ab92486     | 1:1000-1:5000  | <a href="https://www.abcam.com/tgf-beta-1-antibody-ab92486.html">https://www.abcam.com/tgf-beta-1-antibody-ab92486.html</a>                                                                                                                                                                                         |
| Collagen 3a1                                           | Novus Biologicals       | NB600-594   | 1:1000-1:5000  | <a href="https://www.novusbio.com/products/collagen-iii-alpha-1-col3a1-antibody_nb600-594">https://www.novusbio.com/products/collagen-iii-alpha-1-col3a1-antibody_nb600-594</a>                                                                                                                                     |
| TLR4                                                   | Novus Biologicals       | NB100-56579 | 1:1000-1:5000  | <a href="https://www.novusbio.com/products/tlr4-antibody_nb100-56579">https://www.novusbio.com/products/tlr4-antibody_nb100-56579</a>                                                                                                                                                                               |
| Tubulin                                                | Sigma                   | T6199       | 1:5000-1:10000 | <a href="https://www.sigmaaldrich.com/catalog/product/sigma/t6199?lang=en&amp;region=US&amp;cm_sp=Insite-_-caSrpResults_srpRecs_srpModel_t6199-_-srpRecs3-1">https://www.sigmaaldrich.com/catalog/product/sigma/t6199?lang=en&amp;region=US&amp;cm_sp=Insite-_-caSrpResults_srpRecs_srpModel_t6199-_-srpRecs3-1</a> |
| Peroxiredoxin 1/PAG                                    | Abcam                   | ab41906     | 1:1000-1:5000  | <a href="https://www.abcam.com/peroxiredoxin-1pag-antibody-ab41906.html">https://www.abcam.com/peroxiredoxin-1pag-antibody-ab41906.html</a>                                                                                                                                                                         |
| Peroxiredoxin-SO3                                      | Abcam                   | ab16830     | 1:1000-1:5000  | <a href="https://www.abcam.com/peroxiredoxin-so3-antibody-ab16830.html">https://www.abcam.com/peroxiredoxin-so3-antibody-ab16830.html</a>                                                                                                                                                                           |
| MitoProfile (Total OXPHOS Rodent WB antibody cocktail) | Abcam                   | Ab110413    | 1:5000-1:10000 | <a href="https://www.abcam.com/total-oxphos-rodent-wb-antibody-cocktail-ab110413.html">https://www.abcam.com/total-oxphos-rodent-wb-antibody-cocktail-ab110413.html</a>                                                                                                                                             |
| Dityrosine                                             | Stress Marq Biosciences | SMC-521D    | 1:1000-1:5000  | <a href="https://www.stressmarq.com/products/antibodies/dityrosine-antibody-smc-521/?v=7516fd43adaa">https://www.stressmarq.com/products/antibodies/dityrosine-antibody-smc-521/?v=7516fd43adaa</a>                                                                                                                 |
| HRP-linked anti-rabbit IgG                             | CST                     | 7074        | 1:1000-1:5000  | <a href="https://www.cellsignal.com/products/secondary-antibodies/anti-rabbit-igg-hrp-linked-antibody/7074">https://www.cellsignal.com/products/secondary-antibodies/anti-rabbit-igg-hrp-linked-antibody/7074</a>                                                                                                   |
| HRP-linked anti-Mouse IgG                              | CST                     | 7076        | 1:1000-1:5000  | <a href="https://www.cellsignal.com/products/secondary-antibodies/anti-mouse-igg-hrp-linked-antibody/7076">https://www.cellsignal.com/products/secondary-antibodies/anti-mouse-igg-hrp-linked-antibody/7076</a>                                                                                                     |

### DNA/cDNA Clones

| Clone Name | Sequence | Source / Repository | Persistent ID / URL |
|------------|----------|---------------------|---------------------|
|------------|----------|---------------------|---------------------|

DOI [to be added]

|                                          |                       |                     |                                                                                                                                                                                                                                                                                                                                                                               |
|------------------------------------------|-----------------------|---------------------|-------------------------------------------------------------------------------------------------------------------------------------------------------------------------------------------------------------------------------------------------------------------------------------------------------------------------------------------------------------------------------|
| Adenovirus – Nampt overexpression vector | Mouse cDNA            | own                 | doi: 10.1161/CIRCRESAHA.109.203703                                                                                                                                                                                                                                                                                                                                            |
| Adenovirus – sh-Nampt                    | Targeting Rat Nampt   | own                 | doi: 10.1161/CIRCRESAHA.109.203703                                                                                                                                                                                                                                                                                                                                            |
| Adenovirus-sh-Trx1                       | Targeting Rat Trx1    | own                 | doi: 10.1074/jbc.M117.807735                                                                                                                                                                                                                                                                                                                                                  |
| Adenovirus-sh-Sirt1                      | Targeting Mouse Sirt1 | Dr. Abdellatif lab  | DOI: 10.1161/CIRCRESAHA.108.193102                                                                                                                                                                                                                                                                                                                                            |
| Adenovirus-sh-Control                    |                       | Dr. Abdellatif lab  | DOI: 10.1161/CIRCRESAHA.108.193102                                                                                                                                                                                                                                                                                                                                            |
| Adenovirus-Keima                         |                       | own                 | DOI: 10.1161/CIRCRESAHA.116.303356                                                                                                                                                                                                                                                                                                                                            |
| Adenovirus-GFP-LC3                       |                       | own                 | DOI: 10.1161/01.RES.0000261924.76669.36                                                                                                                                                                                                                                                                                                                                       |
| Rat sh-NADK                              | Targeting Rat NADK    | Qiagen (SI04748191) | <a href="https://geneglobe.qiagen.com/product-groups/flexitube-sirna">https://geneglobe.qiagen.com/product-groups/flexitube-sirna</a>                                                                                                                                                                                                                                         |
| Rat sh-Sirt3                             | Targeting Rat Sirt3   | Qiagen (SI01584779) | <a href="https://geneglobe.qiagen.com/product-groups/flexitube-sirna">https://geneglobe.qiagen.com/product-groups/flexitube-sirna</a>                                                                                                                                                                                                                                         |
| Negative Control shRNA                   |                       | Qiagen (1022076)    | <a href="https://www.qiagen.com/us/products/discovery-and-translational-research/functional-and-cell-analysis/rna-silencing/sirna/negative-control-sirna/?clear=true#orderinginformation">https://www.qiagen.com/us/products/discovery-and-translational-research/functional-and-cell-analysis/rna-silencing/sirna/negative-control-sirna/?clear=true#orderinginformation</a> |

### Cultured Cells

| Name                                                               | Vendor or Source | Sex (F, M, or unknown) | Persistent ID / URL  |
|--------------------------------------------------------------------|------------------|------------------------|----------------------|
| Neonatal rat ventricular myocytes (NRVM) isolation. BR-Wistar rats | Harlan           | Both of 1-day-old pups | doi: 10.1038/nm.3322 |

### Oligomers for genotyping PCR

| Description               | Source / Repository         | Sequence                                                                                                                           |
|---------------------------|-----------------------------|------------------------------------------------------------------------------------------------------------------------------------|
| Tg-Nampt mouse genotyping | Integrated DNA technologies | Forward – 5': GGC ACT CTT AGC AAA CCT CA<br>Reverse – 5': TTC CAT CCT CTT TCG TTA AA                                               |
| Nampt+/- mouse genotyping | Integrated DNA technologies | A – 5': AGC AAC AAC CAA ACC AAA CCA ACT G<br>B – 5': CGA TTC CAC CGC CGC CTT CTA TGA AA<br>C – 5': TAC GAT GGT CAT CTC CCG ATT GAA |
